# Supplementary material for: Incidence of chikungunya virus infections among Kenyan children with neurological disease, 2014–2018: A cohort study
Source: PubMed Central journal article supplement (PMC9135332; doi:10.1371/journal.pmed.1003994), 2022-05-12

# CSF samples reads mapped on to CHIKV reference (HQ456255.1)

Sample ID  
121682

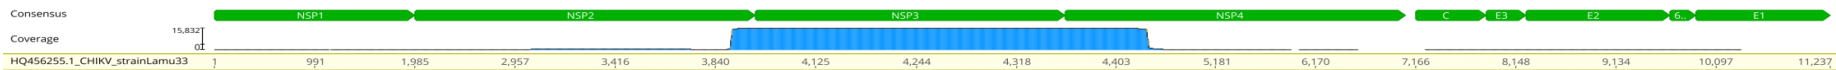

Sample ID  
124750

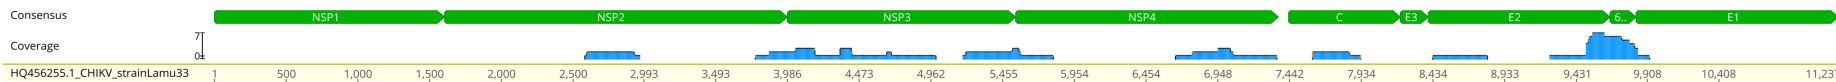

Sample ID  
124887

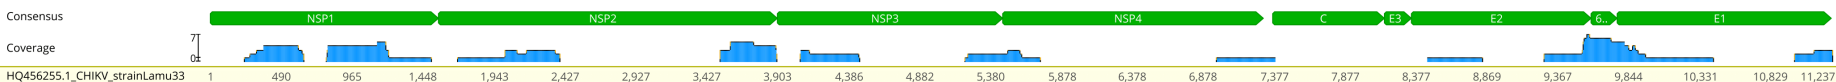

Sample ID  
125319

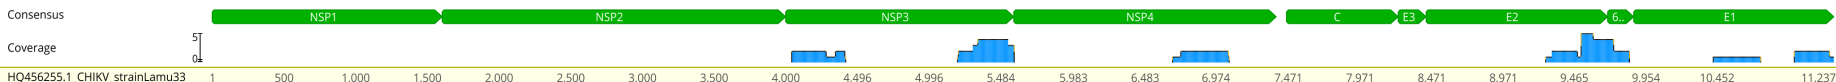

Sample ID  
130842

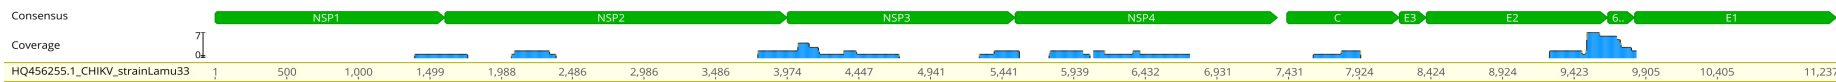

Sample ID  
132063

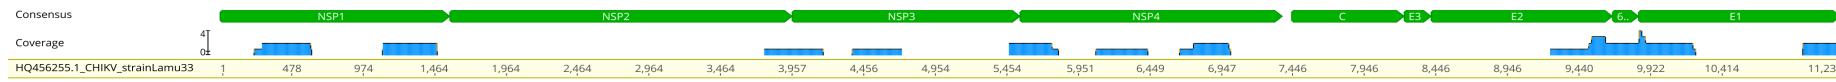

Sample ID  
MT526797.1

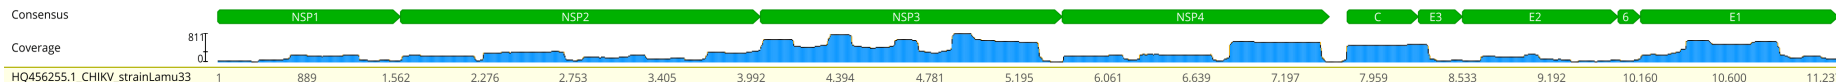

Supplement: pmed.1003994.s008.pdf [file pmed.1003994.s008.pdf]
